# Supplementary material for: To what extent are surgery and invasive procedures effective beyond a placebo response? A systematic review with meta-analysis of randomised, sham controlled trials
Source: HighWire-hosted journal article supplement (doi:10.1136/bmjopen-2015-009655), 2015-12-01

**Supplemental Figure 1. Meta-analysis of dichotomous outcomes from 12 studies that provided no continuous outcome**

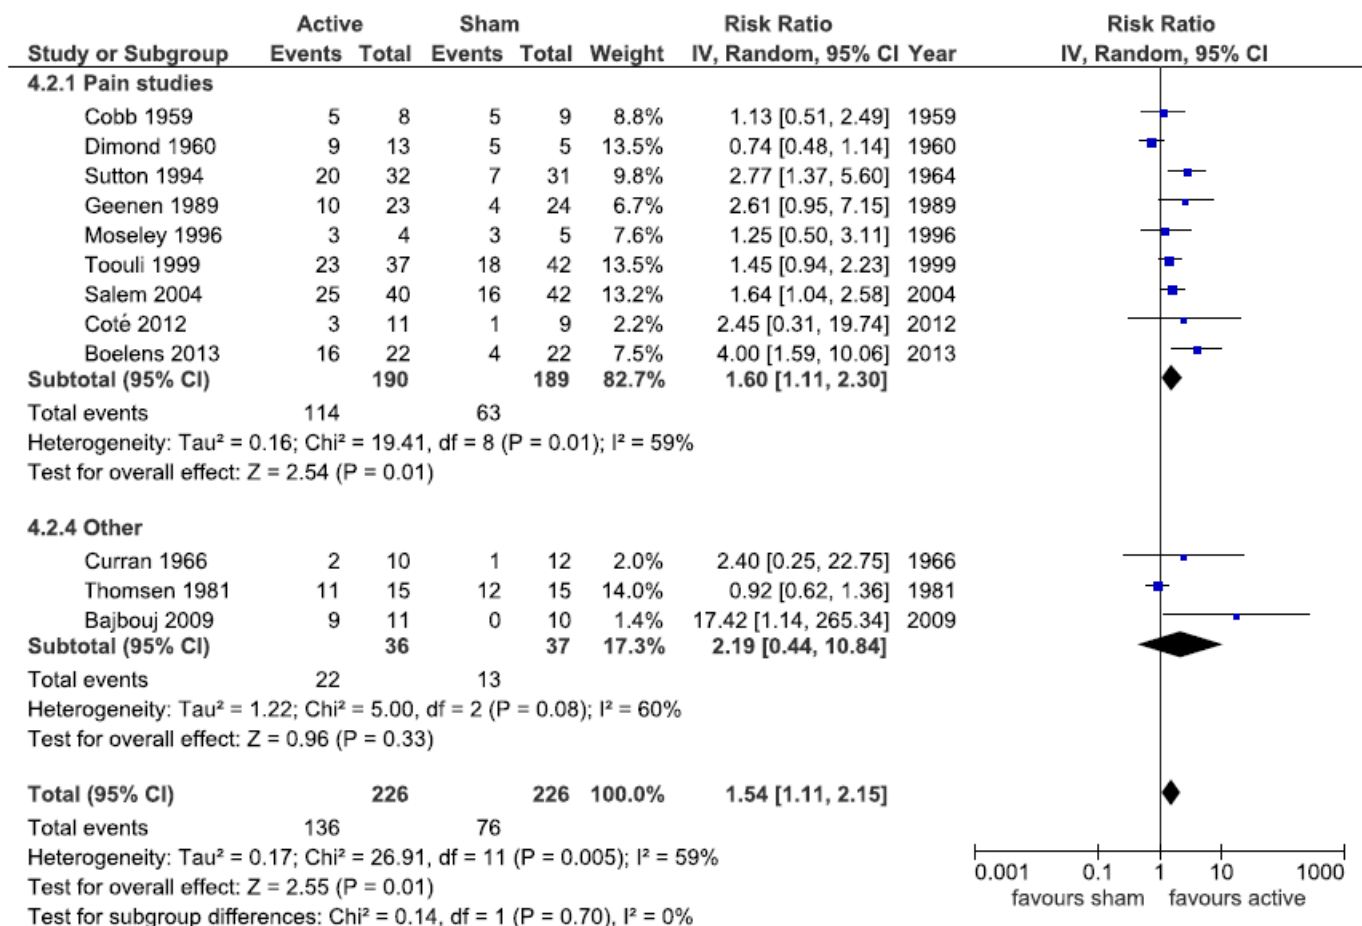

Supplement: bmjopen-2015-009655supp_figure.pdf [file bmjopen-2015-009655supp_figure.pdf]
