# Supplementary material for: To what extent are surgery and invasive procedures effective beyond a placebo response? A systematic review with meta-analysis of randomised, sham controlled trials
Source: HighWire-hosted journal article supplement (doi:10.1136/bmjopen-2015-009655), 2015-12-01
Supplement: bmjopen-2015-009655supp_table.pdf [file bmjopen-2015-009655supp_table.pdf]

## Online Supplemental Material

**Supplemental Table 1. Characteristics of Included Studies**

| Source                                            | Condition                  | N Total Entered (Treatment/ Control) | Treatment                                                                          | Sham Treatment                                                                                                                                                                                                    | Concealment | Outcome for Main Analysis                                 | Author Conclusions |
|---------------------------------------------------|----------------------------|--------------------------------------|------------------------------------------------------------------------------------|-------------------------------------------------------------------------------------------------------------------------------------------------------------------------------------------------------------------|-------------|-----------------------------------------------------------|--------------------|
| <b>PAIN</b>                                       |                            |                                      |                                                                                    |                                                                                                                                                                                                                   |             |                                                           |                    |
| Sutton et al,1994[46]<br>Sutton et al,1997[45]    | endometriosis              | T32/ C 31                            | laparoscopic laser treatment of endometriosis                                      | diagnostic laparoscopy with three incisions in the same locations as the active treatment and the removal of the serosanguinous fluid from the Pouch of Douglas to perform an inspection of the pelvic peritoneum | Unclear     | patients with pain improvement at 6 months ‡              | (+)                |
| Abbott et al, 2004[42]                            | endometriosis              | T 20/ C 19                           | laparoscopic excision of endometriosis tissues                                     | diagnostic laparoscopic procedure with no laparoscopic excision of endometriosis tissues -(delayed surgery)                                                                                                       | Adequate    | overall pain reduction at 6 months †                      | (+)                |
| Jarrell et al,2005[44]<br>Jarrell et al, 2007[43] | endometriosis              | T 8/ C 7                             | laparoscopy biopsy and excision                                                    | three incisions and a biopsy but no tissue excision                                                                                                                                                               | Adequate    | §                                                         | (+)                |
| Leclaire et al, 2001[27]                          | low back pain (> 3 months) | T 36/ C 34                           | percutaneous radiofrequency articular denervation done under fluoroscopic guidance | the same procedure without denervation                                                                                                                                                                            | Adequate    | change of Roland-Morris questionnaire score at 12 weeks * | 0                  |

|                            |                                          |            |                                                                                                                                                                                             |                                                                                                                                                                                                                                                                                                   |          |                                                                 |     |
|----------------------------|------------------------------------------|------------|---------------------------------------------------------------------------------------------------------------------------------------------------------------------------------------------|---------------------------------------------------------------------------------------------------------------------------------------------------------------------------------------------------------------------------------------------------------------------------------------------------|----------|-----------------------------------------------------------------|-----|
| Van Kleef et al, 1999[29]  | chronic low back pain                    | T 15/ C 16 | radiofrequency lumbar facet denervation (60-second radiofrequency lesion at 80 C of the medial branch of the posterior primary ramus of the segmental nerves L3–L5 on one or on both sides) | sham denervation where electrodes were introduced as in the active treatment but no radiofrequency lesion was made                                                                                                                                                                                | Unclear  | VAS pain score at 8 weeks †                                     | (+) |
| Nath et al, 2008[28]       | chronic low back pain                    | T 20/ C 20 | percutaneous radiofrequency neurotomy                                                                                                                                                       | identical procedure except no current was used and the electrode tip remained at body temperature                                                                                                                                                                                                 | Unclear  | global improvement for back pain according to VAS at 6 months † | (+) |
| Freeman et al, 2005[26]    | chronic discogenic low back pain         | T 38/ C 19 | positioning of IDET catheter and delivering of electrothermal energy                                                                                                                        | positioning of the IDET catheter without delivering electrothermal energy                                                                                                                                                                                                                         | Unclear  | Low back pain outcome score (LBOS) at 6 months †                | 0   |
| Buchbinder et al, 2009[12] | painful osteoporotic vertebral fractures | T 38/ C 40 | vertebroplasty                                                                                                                                                                              | same procedures up to the insertion of the 13-gauge needle to rest on the lamina. The central sharp stylet was then replaced with a blunt stylet. To simulate vertebroplasty, the vertebral body was gently tapped, and polymethylmethacrylate was prepared so that its smell permeated the room. | Adequate | overall pain score at 3 months *                                | 0   |

|                                             |                                          |            |                                                                                     |                                                                                                                                                                        |          |                                                                                                                                   |     |
|---------------------------------------------|------------------------------------------|------------|-------------------------------------------------------------------------------------|------------------------------------------------------------------------------------------------------------------------------------------------------------------------|----------|-----------------------------------------------------------------------------------------------------------------------------------|-----|
| Kallmes et al, 2009[13]                     | painful osteoporotic vertebral fractures | T 68/ C 63 | vertebroplasty                                                                      | simulated procedure without cement where methacrylate monomer was opened to simulate the odor associated with PMMA mixing but needles were not placed nor PMMA infused | Adequate | RDQ (Roland-Morris disability score) at 1 month †                                                                                 | 0   |
| Patel et al, 2012[30]                       | chronic sacroiliac joint pain            | T 34/ C 17 | lateral branch neurotomy using cooled radiofrequency                                | sham neurotomy where the treatment was identical, except that radiofrequency energy was not delivered.                                                                 | Unclear  | comparison of mean change from baseline in NRS pain score between treatment and sham groups at the 3-month follow-up time-point * | (+) |
| Cobb, 1959[34]                              | angina pectoris                          | T 8/ C 9   | ligation of the internal mammary arteries after they had been isolated              | sham ligation of the internal mammary arteries after they had been isolated                                                                                            | Unclear  | subjective improvement in angina >40% ‡                                                                                           | 0   |
| Dimond, 1960[35]                            | angina pectoris                          | not stated | ligation of internal mammary artery                                                 | sham ligation (skin incision with exposure of the internal mammary arteries with no ligation)                                                                          | Unclear  | >=50% subjective improvement ‡                                                                                                    | 0   |
| Salem et al, 2004[38] Salem et al, 2005[37] | angina pectoris                          | T 40/ C 42 | Percutaneous Myocardial Laser Revascularization (PMLR) plus optimal medical therapy | sham procedure involving the laser catheter being inserted but connected to a hidden lead box plus optimal medical therapy                                             | Adequate | mean Canadian Cardiovascular Society angina (CCS) class at 12 months ‡                                                            | (+) |

|                           |                    |                                         |                                                                                                                             |                                                                                                                                                                                                                                                                          |          |                                                                                                     |     |
|---------------------------|--------------------|-----------------------------------------|-----------------------------------------------------------------------------------------------------------------------------|--------------------------------------------------------------------------------------------------------------------------------------------------------------------------------------------------------------------------------------------------------------------------|----------|-----------------------------------------------------------------------------------------------------|-----|
| Leon, et al, 2005[36]     | angina pectoris    | T 196/ C 102                            | Biosense direct myocardial revascularization (DMR) with laser catheter introduced and advanced to the left ventricular (LV) | the laser (already in the room) was turned on but no further procedure was performed                                                                                                                                                                                     | Unclear  | exercise treadmill duration at 6 months *                                                           | 0   |
| Moseley et al, 1996[32]   | arthritis          | Lavage: 3/<br>Debridement:<br>2/ C 5    | arthroscopic débridement or arthroscopic lavage                                                                             | patients undergoing placebo arthroscopy were prepared, draped, examined, and injected with local anesthetic in the same manner as the other two groups. Three stab wounds were made in the skin with a scalpel, but no instruments of any kind were placed into the knee | Unclear  | a "strongly agree" response to question "Do you feel the operation was worthwhile?" ‡               | (-) |
| Moseley et al, 2002[11]   | arthritis          | Lavage: 61/<br>Debridement:<br>59/ C 60 | arthroscopic débridement or arthroscopic lavage                                                                             | as described above                                                                                                                                                                                                                                                       | Adequate | KSPS (knee-specific pain scale) at 24 months *                                                      | 0   |
| Bradley et al, 2002[31]   | arthritis          | T 89/ C 91                              | arthroscopic knee irradiation                                                                                               | sham irradiation (needle was advanced to, but not through, the joint capsule)                                                                                                                                                                                            | Unclear  | WOMAC function score (Western Ontario and McMaster Universities Osteoarthritis Index) at 52 weeks † | (-) |
| Sihvonen et al., 2013[33] | arthritis          | T 70/ C 76                              | arthroscopic partial meniscectomy                                                                                           | a standard arthroscopic partial meniscectomy was simulated with sham surgery                                                                                                                                                                                             | Adequate | the Lysholm knee score at 12 mos after surgery *                                                    | 0   |
| Dowson et al, 2008[49]    | migraine with aura | T 74/ C 73                              | Patent foramen ovale (PFO) closure with the STARFlex septal repair implant                                                  | a sham procedure (skin incision in the groin only)                                                                                                                                                                                                                       | Adequate | migraine attacks/month at 4-6 months †                                                              | 0   |

|                         |                   |                                                                                                                          |                                                                                                                                                                                                                                                                                                                        |                                                                                                                                                                                           |          |                                                        |     |
|-------------------------|-------------------|--------------------------------------------------------------------------------------------------------------------------|------------------------------------------------------------------------------------------------------------------------------------------------------------------------------------------------------------------------------------------------------------------------------------------------------------------------|-------------------------------------------------------------------------------------------------------------------------------------------------------------------------------------------|----------|--------------------------------------------------------|-----|
| Guyuron et al, 2009[50] | migraine headache | T 49/ C 26                                                                                                               | Surgery in the predominant trigger sites (frontal (F), temporal (T) and occipital (O)) with endoscopic removal of the glabellar muscles encasing the supraorbital and supratrochlear nerves, removal of a segment of the zygomaticotemporal branch of the trigeminal nerve, and removal of the greater occipital nerve | sham surgery with exposure of the muscles and nerves through a similar incision but the integrity of the structures was maintained                                                        | Adequate | change in frequency of migraine attacks at 12 months † | (+) |
| Geenen et al, 1989[47]  | cholia            | T 23/ C 24                                                                                                               | endoscopic sphincterotomy                                                                                                                                                                                                                                                                                              | sham sphincterotomy was performed exactly as was the true sphincterotomy except that the sphincterotome was positioned in the duodenal lumen during activation of the electrocautery unit | Unclear  | patients with "good" symptom scores at 12 months ‡     | (+) |
| Toouli et al, 2000[48]  | cholia            | SO stenosis: Sham 13/ Endoscopic sphincterotomy (ES) 13/ SO dyskinesia: sham 10/ ES 11/ Normal manometry: Sham 19/ ES 13 | endoscopic sphincterotomy (ES)                                                                                                                                                                                                                                                                                         | endoscopy with introduction of a papillotome into the duodenum after which the "noises" of sphincterotomy were created                                                                    | Unclear  | improvement in abdominal pain at 24 months ‡           | (+) |

|                             |                                                      |            |                                                                                       |                                                                                                                                  |          |                                                                                             |     |
|-----------------------------|------------------------------------------------------|------------|---------------------------------------------------------------------------------------|----------------------------------------------------------------------------------------------------------------------------------|----------|---------------------------------------------------------------------------------------------|-----|
| Cote et al, 2012[39]        | painful pancreatic sphincter dysfunction             | T 11/ C 9  | biliary endoscopic sphincterotomy (BES)                                               | sham endoscopy (not described)                                                                                                   | Adequate | patients with two or more distinct episodes of acute pancreatitis at follow up evaluation ‡ | 0   |
| Boelens et al, 2013[40]     | painful anterior cutaneous nerve entrapment syndrome | T 22/ C 22 | Neurectomy of the intercostal nerve endings at the level of the abdominal wall        | Sham surgery with the exposure to the abdominal wall and then closed with no further surgical procedure                          | Adequate | patients achieving a minimal 50% improvement in pain perception measured using a VAS ‡      | (+) |
| Swank et al, 2003[41]       | chronic abdominal pain and adhesions                 | T 52/ C 48 | Laparoscopic adhesiolysis                                                             | diagnostic laparoscopy only                                                                                                      | Adequate | pain relief after one year using a VAS *                                                    | 0   |
| Davys et al, 2005[83]       | plantar callosities in rheumatoid arthritis          | T 19/ C 19 | normal callus treatment (NCT) comprised of sharp scalpel debridement of the callosity | NCT was simulated by the podiatrist using a bluntedged scalpel such that no callus tissue was debrided                           | Adequate | forefoot pain §                                                                             | 0   |
| <b>Obesity</b>              |                                                      |            |                                                                                       |                                                                                                                                  |          |                                                                                             |     |
| Lindor et al, 1987[53]      | obesity                                              | T 11/ C11  | intragastric balloon placed                                                           | an empty introducer tube was inserted, its position was confirmed fluoroscopically and 200 ml of air was pumped into the stomach | Unclear  | weight loss at 2-3 months †                                                                 | 0   |
| Meshkinpour et al, 1988[60] | obesity                                              | T 21/ C 21 | the Garren-Edwards gastric bubble inserted                                            | insertion of an unloaded introducer tube after having modified the slit and simulation of the bubble inflation process           | Unclear  | weight loss at 12 weeks †                                                                   | 0   |

|                                |         |            |                                                                                                                                                                                                                              |                                                                                                        |         |                                                |     |
|--------------------------------|---------|------------|------------------------------------------------------------------------------------------------------------------------------------------------------------------------------------------------------------------------------|--------------------------------------------------------------------------------------------------------|---------|------------------------------------------------|-----|
| Mathus-Vliegen et al, 1990[55] | obesity | T 14/ C 14 | four treatment combinations were compared: group A: balloon-sham; group B: sham-balloon; group C balloon-balloon; and group D: sham-sham. the treatment included two periods of each of balloon or sham therapy for 4 months | sham groups involved insertion of a balloon where the balloon was empty                                | Unclear | weight loss at 1-17 weeks †                    | 0   |
| Rigaud et al, 1995[61]         | obesity | T 11/ C 9  | endoscopic air filled balloon insertion                                                                                                                                                                                      | sham involved empty balloon insertion                                                                  | Unclear | weight †                                       | 0   |
| Mathus-Vliegen et al, 1996[59] | obesity | T 8/ C 9   | endoscopic balloon insertion                                                                                                                                                                                                 | empty balloon insertion                                                                                | Unclear | weight at 4 months †                           | 0   |
| Mathus-Vliegen et al, 2002[56] | obesity | T 20/ C 23 | endoscopic balloon insertion                                                                                                                                                                                                 | empty balloon insertion                                                                                | Unclear | weight at 13 weeks †                           | 0   |
| Mathus-Vliegen et al, 2003[58] | obesity | T 11/ C 17 | endoscopic balloon insertion                                                                                                                                                                                                 | empty balloon insertion                                                                                | Unclear | weight at 13 weeks †                           | 0   |
| Genco et al, 2006[51]          | obesity | T 16/ C 16 | endoscopic balloon insertion                                                                                                                                                                                                 | endoscopic examination in sedated patients but no balloon insertion in the first 3 months of treatment | Unclear | body mass index †                              | (+) |
| Gersin et al, 2010[52]         | obesity | T 21/ C 26 | endoscopic insertion of a duodenojejunal bypass liner (DJBL)                                                                                                                                                                 | conscious sedation during which an EGD and a mock procedure were performed                             | Unclear | percentage of excess weight loss at 12 weeks * | (+) |

|                                 |                             |            |                                                                                                 |                                                                                                                                |          |                                                          |     |
|---------------------------------|-----------------------------|------------|-------------------------------------------------------------------------------------------------|--------------------------------------------------------------------------------------------------------------------------------|----------|----------------------------------------------------------|-----|
| Mathus-Vliegen et al, 2005[57]  | treatment-resistant obesity | T 12/ C 21 | the placement assembly consisted of a sheath with the collapsed balloon and a balloon fill tube | the collapsed balloon was not present in the assembly but otherwise mimicked the balloon procedure                             | Adequate | §                                                        | 0   |
| Martinez-Brocca et al, 2007[54] | treatment-resistant obesity | T 11/ C 11 | endoscopic balloon insertion                                                                    | insertion of a deflated balloon                                                                                                | Unclear  | weight at 12 weeks †                                     | (+) |
| <b>GERD</b>                     |                             |            |                                                                                                 |                                                                                                                                |          |                                                          |     |
| Corley et al, 2003[62]          | GERD                        | T 35/ C 29 | radiofrequency energy delivery to the gastroesophageal junction at each deployment position     | balloon inflation at each deployment position without needle deployment or energy delivery                                     | Adequate | heartburn score at 6 months †                            | (+) |
| Deviere et al, 2005[63]         | GERD                        | T 32/ C 32 | endoscopic implantation of a biocompatible nonresorbable copolymer                              | diagnostic upper endoscopy only                                                                                                | Adequate | GERD-HRQL heartburn score reduction at 3 months †        | (+) |
| Montgomery et al, 2006[64]      | GERD                        | T 22/ C 24 | gastric plication with endoscopical placement of two to four sutures                            | endoscopy with patient anaesthetized for approximately 40 min (corresponding to the time needed to perform the real procedure) | Adequate | GSRS gastrointestinal symptom rating scale at 3 months † | 0   |



|                                                                                                                                                         |                     |            |                                                                              |                                                                                                                                                                         |          |                                                                             |     |
|---------------------------------------------------------------------------------------------------------------------------------------------------------|---------------------|------------|------------------------------------------------------------------------------|-------------------------------------------------------------------------------------------------------------------------------------------------------------------------|----------|-----------------------------------------------------------------------------|-----|
| Rothstein et al, 2006[65]                                                                                                                               | GERD                | T 72/ C 72 | gastric plication with endoscopic placement of one sutures                   | The sham procedure mimicked the treatment procedure through the positioning of the plicator but with no sutures placed                                                  | Adequate | GERD-HRQL (health-related quality of life) at 3 months †                    | (+) |
| Schwartz et al, 2007[66]                                                                                                                                | GERD                | T 20/ C 20 | endoscopic gastroplication along the lesser curvature and greater curvatures | the sham procedure was carried out using the same equipment, but without the suturing needle and thread loaded                                                          | Adequate | heartburn score at 3 months †                                               | (+) |
| <b>Parkinson's</b>                                                                                                                                      |                     |            |                                                                              |                                                                                                                                                                         |          |                                                                             |     |
| Freed et al, 2001[67]<br>Nakamura et al, 2001[72]<br>Greene et al, 2002[69]<br>McRae et al, 2003[70]<br>McRae et al, 2004[71]<br>Gordon et al, 2004[68] | parkinson's disease | T 20/ C 20 | deep brain implantation of embryonic dopamine neurons                        | identical procedure except that the dura mater was not penetrated after the twist-drill holes had been made in the frontal bone                                         | Unclear  | §                                                                           | 0   |
| Olanow et al, 2003[73]                                                                                                                                  | parkinson's disease | T 23/ C 11 | bilateral fetal nigral transplantation into the brain                        | treated in an identical manner except that partial burr holes that did not penetrate the inner table of the skull, no needles were inserted and no tissue was implanted | Unclear  | UPDRS motor score (Unified Parkinson's Disease Rating Scale) at 24 months * | 0   |
| <b>Other</b>                                                                                                                                            |                     |            |                                                                              |                                                                                                                                                                         |          |                                                                             |     |

|                                                                                              |                                    |             |                                                                                                                        |                                                                                                                                                                      |         |                                                                             |     |
|----------------------------------------------------------------------------------------------|------------------------------------|-------------|------------------------------------------------------------------------------------------------------------------------|----------------------------------------------------------------------------------------------------------------------------------------------------------------------|---------|-----------------------------------------------------------------------------|-----|
| Curran, 1966[80]<br>Curran, 1971[79]                                                         | asthma                             | T 10/ C 13  | standard glomectomy procedure                                                                                          | sham glomectomy in which the carotid bifurcation was only exposed and subcutaneous tissue was sent to the pathologist                                                | Unclear | physician's opinion of "definite" improvement at 6 months ‡                 | 0   |
| Thomsen et al, 1983[86]<br>Bretlau et al, 1984[82]<br>Thomsen,1981 [85]<br>Thomsen,1986 [87] | meniere's disease                  | T 15/ C 15  | regular endolymphatic sac shunt operation with insertion of silastic into the sac draining out into the mastoid cavity | mastoidectomy with care was taken not to remove the bone over the endolymphatic sac in order to avoid a decompression                                                | Unclear | investigator's evaluation of operative effect: "good effect" at 12 months ‡ | (-) |
| Winters, 1984[88]                                                                            | dilated esophagus                  | T 8/ C 8    | bougienage (dilatation of esophagus) with a 54 F bougie                                                                | sham bougienage using a 24 F bougie                                                                                                                                  | Unclear | chest pain score at 2 weeks †                                               | 0   |
| Larson et al, 1998[84]                                                                       | Benign Prostatic Hyperplasia (BPH) | T 125/ C 44 | high efficiency microwave thermoablation                                                                               | same procedure except without microwave power and coolant temperature was increased in increments from 8 to 20°C over the same time period as in the microwave group | Unclear | AUA score (American urological association) at 6 months †                   | (+) |
| Slusser et al, 1998[77]                                                                      | dry eye                            | T 28/ C 28  | Herrick lacrimal plugs were inserted into both canaliculi of one previously randomized eye                             | manipulation of eye without insertion of Herrick lacrimal plugs                                                                                                      | Unclear | subjective dryness of eye (VAS) at 5 weeks †                                | (+) |
| Geldis et al, 2008[76]                                                                       | dry eye                            | T 19/ C 19  | insertion of punctal plug                                                                                              | tissue manipulation producing the same sensation to the eye with no plug insersion                                                                                   | Unclear | contact lens dry eye questionnaire (CLDEQ) score at 6 weeks †               | 0   |

|                                |                  |            |                                                                |                                                                                                                                |          |                                                                                        |     |
|--------------------------------|------------------|------------|----------------------------------------------------------------|--------------------------------------------------------------------------------------------------------------------------------|----------|----------------------------------------------------------------------------------------|-----|
| Friedman et al, 2008[74]       | sleep apnea      | T 31/ C 31 | palatal implant insertion                                      | identical procedure with no insertion of palatal implants                                                                      | Adequate | reduction in AHI (apnoea/hypopnoea index) at 95 days *                                 | (+) |
| Koutsourelakis et al, 2008[75] | sleep apnea      | T 27/ C 22 | standard submucosal resection of the nasal septum              | nasal tissue manipulation simulating the operation but with no resection of the nasal septum                                   | Unclear  | reduction in AHI (apnoea/hypopnoea index) at 3-4 months †                              | 0   |
| Bajbouj et al, 2009[81]        | globus           | T 11/ C 10 | endoscopy performed and APC therapy applied                    | after endoscopy, patients were connected with APC applicator but current flow was disconnected as soon as patients were asleep | Adequate | patients with overall symptom improvement (yes or no) at 3 months ‡                    | (+) |
| Castro et al., 2009[79]        | asthma           | T 190/ C98 | bronchoscopy with bronchial thermoplasty                       | bronchoscopy, which mimicked thermal bronchoplasty                                                                             | Adequate | asthma quality of life (AQLQ) score, average of 6, 9 and 12 weeks †                    | (+) |
| Rodriguez et al, 2009[89]      | Type II diabetes | T 12/ C 6  | endoscopic insertion of a duodenal-jejunal bypass liner (DJBL) | sham endoscopy                                                                                                                 | Unclear  | improvement in glycemic control as measured by HbA1c change from baseline to week 12 * | (+) |

\* primary main outcome measure used; † most important outcome measure used; ‡ only responder data available, not used in main analysis; § insufficient data to include in meta-analysis

author conclusions: (+) favors intervention, (0) no benefit, (-) favors placebo or "placebo effect noted in author conclusions"

T: real treatment; C: sham control
